# Supplementary material for: First insight into the viral community of the cnidarian model metaorganism Aiptasia using RNA-Seq data
Source: PeerJ. 2018 Mar 1;6:e4449. doi: 10.7717/peerj.4449 (PMC5835348; doi:10.7717/peerj.4449)
Supplement: Table S1 — Provided are viral taxonomic assignment, genome organization, respective hosts, abundance estimates across conditions, and assigned group information (Fig. 2). A1M–A4M, aposymbiotic (0 days); I1M–I4M, partially populated (after 12 days of infection); S1M–S4M, fully symbiotic (fully infected, after 30 days of infection). [file peerj-06-4449-s001.xlsx]

## Sheet: Supp. Table S1
Viral name (taxon)	order	family	genus	Genome Organization	Host1	Host2	Host3	Host4	A1M	A2M	A3M	A4M	I1M	I2M	I3M	I4M	S1M	S2M	S3M	S4M	Assigned Group
Dulcamara mottle virus	Tymovirales	Tymoviridae	Tymovirus	ssRNA(+)	plant	NA	NA	NA	0.501253	3.0303	2.8103	5.29172	8.88031	2.51256	0.970874	2.07373	9.67742	6.04396	7.62712	4.24403	C
Caviid betaherpesvirus 2	Herpesvirales	Herpesviridae	NA	dsDNA	vertebrate	NA	NA	NA	0.501253	2.77778	3.74707	4.6133	5.01931	4.77387	2.42718	3.22581	9.67742	3.57143	4.23729	3.97878	C
Murid betaherpesvirus 8	Herpesvirales	Herpesviridae	Muromegalovirus	dsDNA	vertebrate	NA	NA	NA	0.250627	1.0101	0.468384	1.22117	6.17761	6.28141	3.15534	4.60829	2.68817	2.1978	3.38983	1.06101	B
Jingmen tick virus		unassigned_Virus	NA	ssRNA(+)	invertebrate	NA	NA	NA	0.250627	2.0202	1.17096	5.29172	5.14801	2.01005	1.21359	2.30415	4.83871	2.74725	2.11864	3.18302	C
Bidens mottle virus		Potyviridae	Potyvirus	ssRNA(+)	plant	NA	NA	NA	0	0.757576	1.17096	2.57802	4.6332	2.26131	1.21359	2.53456	4.30108	3.2967	2.54237	5.83554	C
Crohivirus	Picornavirales	Picornaviridae	NA	ssRNA(+)	Vertebrate	NA	NA	NA	0.501253	4.29293	2.10773	5.15604	3.6036	3.26633	1.69903	3.91705	0.537634	0.824176	1.69492	1.06101	A
Megavirus chiliensis		Mimiviridae	NA	dsDNA	protozoa	NA	NA	NA	3.25815	1.76768	0.936768	0.814111	0.643501	1.50754	3.8835	2.30415	4.83871	1.92308	3.81356	2.38727	A
Cotesia congregata bracovirus		Polydnaviridae	Bracovirus	dsDNA	invertebrate	NA	NA	NA	1.00251	1.51515	3.0445	3.39213	3.861	2.26131	1.21359	0.921659	6.45161	0.824176	1.27119	1.06101	A
Dill cryptic virus 1		Partitiviridae	NA	dsRNA	plant	fungi	NA	NA	0.501253	1.0101	1.40515	2.03528	3.6036	1.00503	1.21359	3.45622	2.68817	2.1978	1.27119	1.85676	B
Vicia cryptic virus		Partitiviridae	Alphapartitivirus	dsRNA	plant	fungi	NA	NA	0.75188	1.0101	1.87354	3.52782	1.4157	1.50754	0.485437	1.15207	2.15054	1.64835	2.9661	1.85676	A
Bat hepevirus		Hepeviridae	NA	ssRNA(+)	vertebrate	NA	NA	NA	0	1.51515	0.936768	3.12076	3.3462	2.26131	1.21359	1.84332	2.68817	0.824176	0.423729	1.59151	B
Hepatitis C virus		Flaviviridae	Hepacivirus	ssRNA(+)	vertebrate	NA	NA	NA	0.250627	0.505051	0.702576	0.949796	2.4453	1.00503	0.970874	0.691244	2.15054	2.74725	1.69492	2.38727	C
Cassia yellow blotch virus		Bromoviridae	Bromovirus	ssRNA(+)	plant	NA	NA	NA	0.250627	2.77778	1.40515	2.57802	2.574	1.25628	0.485437	1.6129	1.07527	0.549451	0.423729	0.795756	A
Saccharomyces cerevisiae killer virus M1		unassigned_Virus	NA	dsRNA	fungi	NA	NA	NA	0.501253	1.0101	1.63934	1.76391	2.1879	1.50754	1.69903	0.691244	1.6129	1.37363	0.847458	0.795756	A
Piscihepevirus A		Hepeviridae	Piscihepevirus	ssRNA(+)	vertebrate	NA	NA	NA	0.250627	0.505051	0	0.814111	1.9305	2.01005	0.970874	1.6129	1.6129	2.74725	0.423729	0.795756	B
Pandoravirus salinus		Pandoraviridae	Pandoravirus	dsDNA	protozoa	NA	NA	NA	0.501253	1.76768	0.936768	0.135685	0.514801	1.00503	1.45631	1.38249	2.15054	0.824176	0.847458	1.06101	A
Phytophthora infestans RNA virus 1		unassigned_Virus	NA	dsRNA	fungi	NA	NA	NA	0	0.505051	0.234192	0.542741	2.4453	0.251256	0	1.15207	1.6129	0.549451	2.11864	1.85676	C
Spring beauty latent virus		Bromoviridae	Bromovirus	ssRNA(+)	plant	NA	NA	NA	0	0.505051	0.702576	0.814111	2.3166	0.753769	0.485437	1.15207	1.07527	0.549451	1.69492	1.06101	B
Primula malacoides virus 1		Partitiviridae	Betapartitivirus	dsRNA	plant	fungi	NA	NA	0	1.0101	0.702576	0.407056	2.4453	1.50754	0.970874	0.921659	0.537634	0.549451	0.423729	1.32626	B
Mouse astrovirus M-52/USA/2008		Astroviridae		ssRNA(+)	vertebrate	NA	NA	NA	0	3.0303	0.702576	1.89959	1.1583	0	0.485437	0.921659	0	0.549451	0.423729	0.795756	A
Beluga Whale coronavirus SW1	Nidovirales	Coronaviridae	Gammacoronavirus	ssRNA(+)	vertebrate	NA	NA	NA	0	0.757576	0.234192	0.949796	2.0592	1.00503	0.728155	1.15207	0.537634	1.0989	0	1.32626	B
Cotia virus		Poxviridae	NA	dsDNA	vertebrate	invertebrate	NA	NA	0.501253	0.757576	0.468384	0.27137	0.2574	0.251256	1.45631	1.15207	1.07527	1.64835	0.423729	1.06101	C
Avian sapelovirus	Picornavirales	Picornaviridae	Sapelovirus	ssRNA(+)	Vertebrate	NA	NA	NA	0	1.26263	0.702576	1.89959	1.4157	0.753769	0.728155	1.15207	0	0.549451	0	0.265252	A
Pandoravirus dulcis		Pandoraviridae	Pandoravirus	dsDNA	protozoa	NA	NA	NA	1.25313	0.505051	0	0.135685	0.514801	1.00503	0.970874	0.230415	1.07527	0.274725	1.69492	1.06101	A
Broad bean mottle virus		Bromoviridae	Bromovirus	ssRNA(+)	plant	NA	NA	NA	0.250627	1.0101	0.468384	1.49254	0.643501	0.502513	0.242718	0.921659	1.6129	0.274725	0	1.06101	A
Red clover cryptic virus 2		Partitiviridae	Betapartitivirus	dsRNA	plant	fungi	NA	NA	0.501253	0.757576	0.234192	0.949796	0.772201	1.00503	0.242718	0.921659	0.537634	0.549451	1.69492	0	A
Salivirus FHB	Picornavirales	Picornaviridae	Salivirus	ssRNA(+)	Vertebrate	NA	NA	NA	0.250627	0.505051	0.468384	1.22117	0.900901	1.00503	1.21359	0.230415	0.537634	0	0.847458	0.795756	B
Bacillus virus SPO1	Caudovirales	Myoviridae	Spo1virus	dsDNA	bacteria	archaea	NA	NA	0	0.505051	0.234192	0.814111	1.6731	0	0.728155	0.460829	1.07527	0.549451	0.847458	0.795756	C
Trichoplusia ni ascovirus 2c		Ascoviridae	Ascovirus	dsDNA	invertebrate	NA	NA	NA	1.50376	0	1.17096	0.27137	0.3861	0.251256	0.485437	0.460829	1.07527	0.824176	0.847458	0.265252	A
Molluscum contagiosum virus		Poxviridae	Molluscipoxvirus	dsDNA	vertebrate	invertebrate	NA	NA	1.50376	0	0.702576	0.407056	0.2574	0.753769	0.485437	0.921659	0.537634	0.549451	0.423729	0.795756	A
Ictalurid herpesvirus 1	Herpesvirales	Alloherpesviridae	Ictalurivirus	dsDNA	vertebrate	NA	NA	NA	0.250627	1.0101	0.234192	0.27137	0.514801	0.753769	0.970874	0.691244	0	0.549451	0.423729	1.59151	B
Gentian ovary ringspot virus		Virgaviridae	Goravirus	ssRNA(+)	plant	NA	NA	NA	0.501253	0.252525	1.17096	0.678426	0	0.753769	0.242718	0.230415	0.537634	1.0989	0.847458	0.795756	A
Sclerotinia sclerotiorum hypovirus 1		Hypoviridae	Hypovirus	dsRNA	fungi	NA	NA	NA	0.250627	0	1.63934	0.678426	0.900901	0.753769	0.242718	0.691244	0.537634	0.824176	0	0	A
Rhizoctonia solani dsRNA virus 2		Partitiviridae	NA	dsRNA	plant	fungi	NA	NA	0.250627	0.252525	0.936768	1.62822	1.4157	0	1.21359	0.460829	0	0.274725	0	0	A
Sclerotinia sclerotiorum hypovirus 2		Hypoviridae	Hypovirus	dsRNA	fungi	NA	NA	NA	0.501253	0.505051	0.468384	0.678426	0.1287	0.502513	0.242718	0.230415	1.6129	0.549451	0.423729	0.530504	A
Epinotia aporema granulovirus		Baculoviridae	Betabaculovirus	dsDNA	invertebrate	NA	NA	NA	0.250627	0.505051	0.468384	0.135685	0.2574	0.251256	1.45631	1.38249	0.537634	0.274725	0.847458	0	B
Cyprinid herpesvirus 2	Herpesvirales	Alloherpesviridae	Cyprinivirus	dsDNA	vertebrate	NA	NA	NA	0.250627	1.0101	0.702576	0.542741	0.2574	0	0.970874	0.230415	0	0.549451	0.423729	1.06101	A
Porcine astrovirus 4		Astroviridae	Mamastrovirus	ssRNA(+)	vertebrate	NA	NA	NA	0.250627	0.252525	0	0.27137	1.0296	0.502513	0.242718	0.230415	1.07527	1.37363	0.423729	0.265252	C
Tick-borne encephalitis virus		Flaviviridae	Flavivirus	ssRNA(+)	vertebrate	NA	NA	NA	0.250627	0.252525	0.234192	0.542741	2.3166	0.251256	0.242718	0.230415	0.537634	0	0.423729	0.530504	B
Hibiscus latent Singapore virus		Virgaviridae	Tobamovirus	ssRNA(+)	plant	NA	NA	NA	0.501253	0.252525	0.234192	1.08548	0.900901	0.251256	0.485437	0.691244	0	0.549451	0.423729	0.265252	A
Limnipivirus B	Picornavirales	Picornaviridae	Limnipivirus	ssRNA(+)	Vertebrate	NA	NA	NA	0	0.252525	0.468384	0.814111	1.287	0.753769	0.242718	0.230415	0.537634	0.274725	0	0.530504	B
Potamipivirus A	Picornavirales	Picornaviridae	Potamipivirus	ssRNA(+)	Vertebrate	NA	NA	NA	0	0.505051	0.702576	0.814111	1.0296	0.753769	0	0.230415	0.537634	0.274725	0.423729	0	A
Simian adenovirus DM-2014		Adenoviridae	Mastadenovirus	dsDNA	vertebrate	NA	NA	NA	0.250627	0.252525	0.468384	0	0.2574	0	1.21359	0.460829	1.07527	0	0.847458	0.265252	B
Senecavirus A	Picornavirales	Picornaviridae	Senecavirus	ssRNA(+)	Vertebrate	NA	NA	NA	0	0.252525	0.234192	0.542741	0.643501	0	0.485437	0.921659	0	0	0.847458	1.06101	B
Aspergillus foetidus dsRNA mycovirus		unassigned_Virus	NA	dsDNA	fungi	NA	NA	NA	0.250627	0.252525	0.468384	0.407056	0.643501	0	0	0.230415	1.07527	0	0.847458	0.530504	A
Spodoptera frugiperda ascovirus 1a		Ascoviridae	Ascovirus	dsDNA	invertebrate	NA	NA	NA	0	0.757576	0	0	0	0	0	0.460829	0.537634	0.824176	0.847458	0.530504	C
Cardiovirus B	Picornavirales	Picornaviridae	Cardiovirus	ssRNA(+)	Vertebrate	NA	NA	NA	0	0	0.234192	1.08548	0.2574	0.502513	0.485437	0.230415	0	0.549451	0	0.265252	B
Sclerotinia sclerotiorum debilitation-associated RNA virus	Tymovirales	Alphaflexiviridae	Sclerodarnavirus	ssRNA(+)	plant	fungi	NA	NA	0	0.252525	0.234192	0.407056	0.643501	0	0	0.230415	0.537634	0	0.847458	0.265252	C
Hibiscus green spot virus		unassigned_Virus	Higrevirus	ssRNA(+)	plant	NA	NA	NA	0	0.757576	0.468384	0.27137	0	0.251256	0	0	1.07527	0	0	0.530504	A
Campoletis sonorensis ichnovirus		Polydnaviridae	Ichnovirus	dsDNA	invertebrate	NA	NA	NA	0	0.505051	0	0.814111	0.1287	0	0.242718	1.38249	0	0.274725	0	0	B
Porcine astrovirus 3		Astroviridae	Mamastrovirus	ssRNA(+)	vertebrate	NA	NA	NA	0	0	0	0.135685	0.514801	0.753769	0.728155	0.460829	0	0	0.423729	0.265252	B
Phaeocystis globosa virus		Phycodnaviridae	Prymnesiovirus	dsDNA	plant	NA	NA	NA	0	0.505051	0	0	0	0.251256	0	0.230415	1.07527	0	0.423729	0.530504	C
Alphamesonivirus 1	Nidovirales	Mesoniviridae	Alphamesonivirus	ssRNA(+)	invertebrate	NA	NA	NA	0	0.252525	0	0.135685	0	0.251256	0.242718	0.230415	0.537634	0.274725	0.423729	0.530504	C
Garlic common latent virus	Tymovirales	Betaflexiviridae	Carlavirus	ssRNA(+)	plant	fungi	NA	NA	0	0	0.234192	0.135685	0.643501	0.251256	0	0.460829	0.537634	0.549451	0	0	B
Cadicivirus A	Picornavirales	Picornaviridae	Dicipivirus	ssRNA(+)	Vertebrate	NA	NA	NA	0	0	0.234192	0.27137	0.1287	0.251256	0.242718	0.460829	0.537634	0.549451	0	0	B
Raspberry latent virus		Reoviridae	NA	dsRNA	vertebrate	invertebrate	plant	fungi	0	0.252525	0.468384	0	0.1287	0	0	0	0.537634	0	1.27119	0	C
Alternaria alternata virus 1		unassigned_Virus	NA	dsRNA	fungi	NA	NA	NA	0	0	0.234192	0.407056	0.514801	0	0.728155	0.230415	0	0	0	0.530504	B
Pleurotus ostreatus virus 1		Partitiviridae	Betapartitivirus	dsRNA	plant	fungi	NA	NA	0	0.252525	0.702576	0.135685	0.514801	0	0	0.230415	0	0.274725	0.423729	0	A
Cyprinid herpesvirus 3	Herpesvirales	Alloherpesviridae	Cyprinivirus	dsDNA	vertebrate	NA	NA	NA	0	0	0.234192	0	0.1287	0.502513	0.242718	0	0	0.274725	0.847458	0.265252	C
Avastrovirus 3		Astroviridae	Avastrovirus	ssRNA(+)	vertebrate	NA	NA	NA	0	0	0	0.407056	0.772201	0.502513	0.242718	0	0	0	0	0.530504	B
White clover cryptic virus 2		Partitiviridae	Betapartitivirus	dsRNA	plant	fungi	NA	NA	0	0	0	0.27137	0.1287	0.251256	0	0	0.537634	0.549451	0.423729	0.265252	C
Posavirus 2	Picornavirales	unassigned_Picronavirales	NA	ssRNA(+)	fungi	NA	NA	NA	0	0	0	0.407056	0	0.251256	0.485437	0.460829	0.537634	0	0	0.265252	B
Oryctes rhinoceros nudivirus		Nudiviridae	NA	dsDNA	invertebrate	NA	NA	NA	0	0	0	0	0.2574	0	0	0	0.537634	0.274725	0.423729	0.795756	C
Cyprinid herpesvirus 1	Herpesvirales	Alloherpesviridae	Cyprinivirus	dsDNA	vertebrate	NA	NA	NA	0	0	0	0	0	0	0.242718	0	0.537634	0.549451	0.423729	0.530504	C
Enterovirus H	Picornavirales	Picornaviridae	Enterovirus	ssRNA(+)	Vertebrate	NA	NA	NA	0.250627	0	0.468384	0.542741	0	0.251256	0	0.230415	0	0.274725	0	0.265252	A
Sclerotinia sclerotiorum debilitation-associated RNA virus 2	Tymovirales	unassigned_order_Tymovirales	Sclerotymonavirus	ssRNA(+)	plant	NA	NA	NA	0.250627	0	0.234192	0.542741	0	0	0	0.230415	0.537634	0	0.423729	0	A
Macacine alphaherpesvirus 1	Herpesvirales	Herpesviridae	Simplexvirus	dsDNA	vertebrate	NA	NA	NA	0.250627	0.252525	0.234192	0.27137	0.1287	0	0.242718	0	0.537634	0	0	0.265252	A
Abalone herpesvirus Victoria/AUS/2009	Herpesvirales	unassigned_order_Herpesvirales	Aurivirus	ssRNA(+)	invertebrate	NA	NA	NA	0	0	0	0	0	0	0	0.460829	0	0	1.27119	0.265252	C
Human gammaherpesvirus 8	Herpesvirales	Herpesviridae	Rhadinovirus	dsDNA	vertebrate	NA	NA	NA	0	0	0	0	0	0	0.485437	0	0.537634	0	0.423729	0.530504	C
Maruca vitrata nucleopolyhedrovirus		Baculoviridae	Alphabaculovirus	dsDNA	invertebrate	NA	NA	NA	0	0	0.234192	0.27137	0	0	0.485437	0	0	0.549451	0.423729	0	C
Limnipivirus C	Picornavirales	Picornaviridae	Limnipivirus	ssRNA(+)	Vertebrate	NA	NA	NA	0	0	0.234192	0.135685	0.2574	0	0.242718	0.230415	0	0.549451	0	0.265252	C
Mamastrovirus 3		Astroviridae	Mamastrovirus	ssRNA(+)	vertebrate	NA	NA	NA	0	0.252525	0	0	0.1287	0.251256	0.242718	0.230415	0.537634	0	0	0.265252	B
Glypta fumiferanae ichnovirus		Polydnaviridae	Ichnovirus	dsDNA	invertebrate	NA	NA	NA	0	0.252525	0.234192	0.27137	0.1287	0.251256	0	0.230415	0	0	0	0.530504	A
Synechococcus phage S-RSM4	Caudovirales	Myoviridae	T4virus	dsDNA	bacteria	archaea	NA	NA	0	0	0.702576	0.135685	0.3861	0	0	0.230415	0	0	0.423729	0	A
Synechococcus phage S-RIM2	Caudovirales	Myoviridae	NA	dsDNA	bacteria	archaea	NA	NA	0	0	0.234192	0.407056	0.2574	0	0	0.460829	0	0	0.423729	0	A
Hibiscus latent Fort Pierce virus		Virgaviridae	Tobamovirus	ssRNA(+)	plant	NA	NA	NA	0	0.252525	0.234192	0.135685	0	0	0	0.460829	0	0.274725	0.423729	0	A
Dasheen mosaic virus		Potyviridae	Potyvirus	ssRNA(+)	plant	NA	NA	NA	0	0	0	0	0.3861	0.251256	0	0.230415	0.537634	0	0	0.265252	B
Penicillium chrysogenum virus		Chrysoviridae	Chrysovirus	dsRNA	fungi	NA	NA	NA	0	0	0	0	0	0	0	0	0	0.549451	0.847458	0.265252	C
Avian metapneumovirus	Mononegavirales	Pneumoviridae	Metapneumovirus	ssRNA(-)	vertebrate	NA	NA	NA	0	0	0	0	0	0	0.242718	0	0.537634	0.274725	0	0.530504	C
Laodelphax striatella honeydew virus 1	Picornavirales	Iflaviridae	NA	ssRNA(+)	invertebrate	NA	NA	NA	0	0.252525	0.234192	0.27137	0.2574	0	0	0	0.537634	0	0	0	A
Southern elephant seal virus		Togaviridae	Alphavirus	ssRNA(+)	vertebrate	invertebrate	NA	NA	0	0	0	0.27137	0.1287	0.251256	0.242718	0.230415	0	0	0.423729	0	B
Cowpea chlorotic mottle virus		Bromoviridae	Bromovirus	ssRNA(+)	plant	NA	NA	NA	0	0.252525	0.234192	0	0.1287	0.502513	0	0	0	0	0.423729	0	B
Equid gammaherpesvirus 2	Herpesvirales	Herpesviridae	Percavirus	dsDNA	vertebrate	NA	NA	NA	0	0	0	0	0.2574	0	0	0	0	0.549451	0.423729	0.265252	C
Sicinivirus A	Picornavirales	Picornaviridae	Sicinivirus	ssRNA(+)	Vertebrate	NA	NA	NA	0	0.505051	0	0.27137	0.2574	0	0	0.460829	0	0	0	0	A
Pepino mosaic virus	Tymovirales	Alphaflexiviridae	Potexvirus	ssRNA(+)	plant	fungi	NA	NA	0	0.252525	0	0.135685	0	0	0	0	0.537634	0.274725	0	0.265252	C
Autographa californica multiple nucleopolyhedrovirus		Baculoviridae	Alphabaculovirus	dsDNA	invertebrate	NA	NA	NA	0	0	0.234192	0	0	0.251256	0.242718	0	0	0	0.423729	0.265252	C
Solenopsis invicta virus 3		unassigned_Virus	NA	ssRNA(+)	invertebrate	NA	NA	NA	0	0	0	0.27137	0	0.251256	0	0.460829	0	0.274725	0	0	B
Alcelaphine gammaherpesvirus 1	Herpesvirales	Herpesviridae	Macavirus	dsDNA	vertebrate	NA	NA	NA	0	0	0	0	0	0	0	0	0.537634	0	0.423729	0.265252	C
White spot syndrome virus		Nimaviridae	Whispovirus	dsDNA	invertebrate	NA	NA	NA	0.501253	0	0	0.135685	0	0	0	0	0	0.274725	0	0.265252	A
DeBrazzas monkey arterivirus	Nidovirales	Arteriviridae	Arterivirus	ssRNA(+)	vertebrate	NA	NA	NA	0	0	0	0.135685	0.3861	0	0	0.230415	0	0	0.423729	0	B
Hop trefoil cryptic virus 2		Partitiviridae	Betapartitivirus	dsRNA	plant	fungi	NA	NA	0	0.252525	0	0.135685	0	0	0.242718	0	0.537634	0	0	0	A
Glossina hytrovirus		Hytrosaviridae	Glossinavirus	dsDNA	invertebrate	NA	NA	NA	0	0	0	0	0.1287	0.251256	0.242718	0.230415	0	0	0	0.265252	B
Paramecium bursaria Chlorella virus NY2A		Phycodnaviridae	Chlorovirus	dsDNA	plant	NA	NA	NA	0	0	0	0	0.1287	0	0	0	0	0.824176	0	0	C
Human endogenous retrovirus K		Retroviridae	NA	ssRNA(rt)	vertebrate	NA	NA	NA	0	0.252525	0	0	0.2574	0	0	0	0	0	0.423729	0	C
Mouse kobuvirus M-5/USA/2010	Picornavirales	Picornaviridae	Kobuvirus	ssRNA(+)	Vertebrate	NA	NA	NA	0	0.505051	0	0.27137	0.1287	0	0	0	0	0	0	0	A
Ectocarpus siliculosus virus 1		Phycodnaviridae	Phaeovirus	dsDNA	plant	NA	NA	NA	0	0	0	0.135685	0	0.251256	0.242718	0.230415	0	0	0	0	B
Agrotis segetum nucleopolyhedrovirus A		Baculoviridae	Alphabaculovirus	dsDNA	invertebrate	NA	NA	NA	0	0	0	0	0	0	0	0	0	0.549451	0	0.265252	C
Xestia c-nigrum granulovirus		Baculoviridae	Betabaculovirus	dsDNA	invertebrate	NA	NA	NA	0	0	0	0	0	0	0	0	0.537634	0	0	0.265252	C
Anopheles minimus irodovirus		Iridoviridae	NA	dsDNA	vertebrate	invertebrate	NA	NA	0	0	0	0	0	0.251256	0	0	0	0	0	0.530504	C
Human betaherpesvirus 7	Herpesvirales	Herpesviridae	Roseolovirus	dsDNA	vertebrate	NA	NA	NA	0	0	0	0	0	0	0	0	0	0.274725	0.423729	0	C
Cercopithecine alphaherpesvirus 2	Herpesvirales	Herpesviridae	Simplexvirus	dsDNA	vertebrate	NA	NA	NA	0	0	0	0	0	0	0	0	0	0	0.423729	0.265252	C
Helicoverpa armigera nucleopolyhedrovirus		Baculoviridae	Alphabaculovirus	dsDNA	invertebrate	NA	NA	NA	0	0	0	0.135685	0	0	0	0.230415	0	0.274725	0	0	C
Ovine gammaherpesvirus 2	Herpesvirales	Herpesviridae	Macavirus	dsDNA	vertebrate	NA	NA	NA	0	0	0	0.135685	0	0	0	0	0	0	0.423729	0	C
Cowpox virus		Poxviridae	Orthopoxvirus	dsDNA	vertebrate	invertebrate	NA	NA	0	0	0	0	0	0	0.242718	0	0	0.274725	0	0	B
Sorghum chlorotic spot virus		Virgaviridae	Furovirus	ssRNA(+)	plant	NA	NA	NA	0	0	0	0.27137	0	0	0.242718	0	0	0	0	0	B
Ball python nidovirus	Nidovirales	unassigned_order_Nidovirales	NA	ssRNA(+)	vertebrate	NA	NA	NA	0	0	0	0	0	0	0.242718	0	0	0	0	0.265252	B
Anomala cuprea entomopoxvirus		Poxviridae	Alphaentomopoxvirus	dsDNA	vertebrate	invertebrate	NA	NA	0.501253	0	0	0	0	0	0	0	0	0	0	0	A
Agrotis ipsilon multiple nucleopolyhedrovirus		Baculoviridae	Alphabaculovirus	dsDNA	invertebrate	NA	NA	NA	0	0	0	0	0	0	0	0.230415	0	0	0	0.265252	C
Micromonas sp. RCC1109 virus MpV1		Phycodnaviridae	Prasinovirus	dsDNA	plant	NA	NA	NA	0	0.252525	0	0	0	0	0.242718	0	0	0	0	0	B
Acidianus filamentous virus 9	Ligamenvirales	Lipothrixviridae	Betalipothrixvirus	dsDNA	archaea	NA	NA	NA	0	0	0.234192	0	0	0	0.242718	0	0	0	0	0	A
Iris yellow spot tospovirus		Bunyaviridae	Tospovirus	ssRNA(-)	vertebrate	invertebrate	NA	NA	0	0	0	0	0.3861	0	0	0	0	0	0	0	B
Chilli ringspot virus		Potyviridae	Potyvirus	ssRNA(+)	plant	NA	NA	NA	0	0	0	0	0.1287	0.251256	0	0	0	0	0	0	B
Propionibacterium phage PHL113M01	Caudovirales	Siphoviridae	NA	dsDNA	bacteria	archaea	NA	NA	0	0	0	0	0.1287	0	0.242718	0	0	0	0	0	B
Rice tungro spherical virus	Picornavirales	Secoviridae	Waikavirus	ssRNA(+)	plant	NA	NA	NA	0	0	0	0.135685	0	0	0	0.230415	0	0	0	0	B
Rosellinia necatrix partitivirus 2		Partitiviridae	Alphapartitivirus	dsRNA	plant	fungi	NA	NA	0	0	0	0.135685	0.1287	0	0	0	0	0	0	0	A
Tobacco mosaic virus		Virgaviridae	Tobamovirus	ssRNA(+)	plant	NA	NA	NA	0	0	0	0	0.2574	0	0	0	0	0	0	0	B
