# Supplementary material for: First insight into the viral community of the cnidarian model metaorganism Aiptasia using RNA-Seq data
Source: PeerJ. 2018 Mar 1;6:e4449. doi: 10.7717/peerj.4449 (PMC5835348; doi:10.7717/peerj.4449)
Supplement: Table S2 — Shown are viral taxa tested, ANOVA p-values (significant values in bold), and associated post-hoc Tukey tests, as well as assigned groups. [file peerj-06-4449-s002.xlsx]

## Sheet: Supp. Table S2
Viral name (taxon)	ANOVA p value	Tukey p value for partially populated and aposymbiotic	Tukey p value for symbiotic and aposymbiotic	Tukey p vlaue for symbiotic and partially populated	Assigned Group
Cyprinid herpesvirus 1	1.19e-05	0.53535	1.76e-05	4.92e-05	C
Murid betaherpesvirus 8	0.000870236	0.000701633	0.137434	0.0135086	B
Porcine astrovirus 3	0.00116471	0.00118311	0.44126	0.00694043	B
Oryctes rhinoceros nudivirus	0.00167318	0.813933	0.00224412	0.00535054	C
White clover cryptic virus 2	0.00445404	0.953004	0.00672652	0.0104364	C
Hepatitis C virus	0.00709726	0.244055	0.00566612	0.0804998	C
Alphamesonivirus 1	0.00791434	0.609716	0.00788859	0.0348929	C
Alcelaphine gammaherpesvirus 1	0.0150685	1	0.0255048	0.0255048	C
Glossina hytrovirus	0.0155016	0.0139241	0.523528	0.0795257	B
Ectocarpus siliculosus virus 1	0.0243269	0.0676107	0.824214	0.0266076	B
Penicillium chrysogenum virus	0.0317913	1	0.0502807	0.0502807	C
Spodoptera frugiperda ascovirus 1a	0.0334996	0.923615	0.073136	0.0403805	C
Avian metapneumovirus	0.037867	0.860668	0.0414968	0.0939579	C
Bidens mottle virus	0.0399428	0.27922	0.0326711	0.369236	C
Equid gammaherpesvirus 2	0.0463208	0.831554	0.0483956	0.119375	C
Piscihepevirus A	0.0673383	0.0717005	0.150855	0.878587	B
Pepino mosaic virus	0.07323	0.62616	0.26378	0.06449	C
Human gammaherpesvirus 8	0.0743363	0.685445	0.0674075	0.238679	C
Primula malacoides virus 1	0.07885	0.08345	0.88499	0.17075	B
Avian sapelovirus	0.102067	0.991556	0.156645	0.13018	A
Crohivirus	0.104078	0.993341	0.157565	0.133731	A
Human betaherpesvirus 7	0.116953	1	0.160355	0.160355	C
Cercopithecine alphaherpesvirus 2	0.119661	1	0.163607	0.163607	C
Gentian ovary ringspot virus	0.121317	0.324659	0.74106	0.110995	A
Propionibacterium phage PHL113M01	0.134821	0.181619	1	0.181619	B
Phytophthora infestans RNA virus 1	0.135739	0.490748	0.117103	0.562491	C
Chilli ringspot virus	0.138417	0.185845	1	0.185845	B
Dulcamara mottle virus	0.138598	0.929191	0.14775	0.250358	C
Xestia c-nigrum granulovirus	0.142468	1	0.190587	0.190587	C
Porcine astrovirus 4	0.14455	0.512763	0.125019	0.564328	C
Agrotis segetum nucleopolyhedrovirus A	0.144883	1	0.193404	0.193404	C
Rhizoctonia solani dsRNA virus 2	0.164871	0.999887	0.218672	0.214287	A
Sclerotinia sclerotiorum hypovirus 2	0.167566	0.542666	0.593716	0.146127	A
Phaeocystis globosa virus	0.17665	0.9996	0.23429	0.22555	C
Mouse kobuvirus M-5/USA/2010	0.185185	0.304739	0.197704	0.947798	A
Beluga Whale coronavirus SW1	0.193443	0.17838	0.788318	0.433879	B
Dasheen mosaic virus	0.203569	0.238634	0.285573	0.99057	B
Spring beauty latent virus	0.252882	0.277836	0.360955	0.978197	B
Cassia yellow blotch virus	0.256021	0.897043	0.250553	0.444103	A
Megavirus chiliensis	0.260292	0.904125	0.256102	0.443707	A
Aspergillus foetidus dsRNA mycovirus	0.270235	0.851427	0.503674	0.255085	A
Vicia cryptic virus	0.274409	0.540544	0.8165	0.254244	A
Mouse astrovirus M-52/USA/2008	0.285022	0.440584	0.290085	0.941377	A
Caviid betaherpesvirus 2	0.292485	0.799168	0.268943	0.582696	C
Epinotia aporema granulovirus	0.295927	0.314213	0.970326	0.421408	B
Enterovirus H	0.30222	0.34176	0.392793	0.993225	A
Cotia virus	0.304628	0.692003	0.275584	0.703837	C
Dill cryptic virus 1	0.305758	0.294067	0.519024	0.887739	B
Cyprinid herpesvirus 3	0.309709	0.650248	0.281719	0.754162	C
Raspberry latent virus	0.3181	0.84345	0.57715	0.29759	C
Sicinivirus A	0.323128	0.993615	0.36304	0.414457	A
Avastrovirus 3	0.332228	0.361697	0.98596	0.439481	B
Pandoravirus dulcis	0.350715	0.839797	0.327169	0.623419	A
Abalone herpesvirus Victoria/AUS/2009	0.369545	0.901524	0.355875	0.584544	C
Hibiscus green spot virus	0.370336	0.464088	0.993665	0.409141	A
White spot syndrome virus	0.374148	0.392568	0.976178	0.50075	A
Garlic common latent virus	0.394064	0.38512	0.588	0.924538	B
Sclerotinia sclerotiorum debilitation-associated RNA virus 2	0.394106	0.43198	0.993639	0.48865	A
Southern elephant seal virus	0.396999	0.390048	0.930977	0.583966	B
Iris yellow spot tospovirus	0.40534	0.46909	1	0.46909	B
Tobacco mosaic virus	0.40534	0.46909	1	0.46909	B
Anomala cuprea entomopoxvirus	0.405344	0.469092	0.469092	1	A
Macacine alphaherpesvirus 1	0.408025	0.390486	0.897492	0.6336	A
Mamastrovirus 3	0.413281	0.450847	0.507425	0.993913	B
Alternaria alternata virus 1	0.425151	0.53311	0.988098	0.452843	B
Bacillus virus SPO1	0.439559	0.606338	0.437628	0.950561	C
Paramecium bursaria Chlorella virus NY2A	0.459997	0.98055	0.47693	0.582865	C
Hibiscus latent Singapore virus	0.464012	0.955007	0.625935	0.462555	A
Trichoplusia ni ascovirus 2c	0.495505	0.571079	0.998595	0.542195	A
Campoletis sonorensis ichnovirus	0.503998	0.935938	0.691505	0.491256	B
Posavirus 2	0.504168	0.473592	0.818864	0.819828	B
Ovine gammaherpesvirus 2	0.51743	0.9266	0.71646	0.50065	C
Bat hepevirus	0.526188	0.589301	0.99988	0.580757	B
Limnipivirus B	0.53171	0.64928	0.98269	0.54573	B
Anopheles minimus irodovirus	0.562802	0.861635	0.533788	0.832584	C
Cadicivirus A	0.567526	0.625177	0.621729	0.999981	B
Tick-borne encephalitis virus	0.571436	0.595253	0.992067	0.665784	B
Sclerotinia sclerotiorum debilitation-associated RNA virus	0.57851	0.99968	0.64083	0.62661	C
Rice tungro spherical virus	0.588459	0.902521	0.81232	0.563113	B
Solenopsis invicta virus 3	0.592614	0.644493	0.999973	0.648593	B
Salivirus FHB	0.5932	0.72596	0.9721	0.59316	B
Simian adenovirus DM-2014	0.59413	0.72007	0.597164	0.976081	B
DeBrazzas monkey arterivirus	0.613858	0.590048	0.82137	0.91461	B
Agrotis ipsilon multiple nucleopolyhedrovirus	0.619685	0.710491	0.639283	0.99191	C
Cowpox virus	0.6203	0.705992	0.643265	0.99372	B
Sorghum chlorotic spot virus	0.620699	0.994894	0.646184	0.702737	B
Ball python nidovirus	0.621332	0.696721	0.651667	0.996758	B
Autographa californica multiple nucleopolyhedrovirus	0.621405	0.838854	0.596029	0.904937	C
Rosellinia necatrix partitivirus 2	0.622041	0.998847	0.660465	0.687327	A
Micromonas sp. RCC1109 virus MpV1	0.622212	0.999352	0.663755	0.683893	B
Acidianus filamentous virus 9	0.622252	0.999472	0.682898	0.664715	A
Saccharomyces cerevisiae killer virus M1	0.622315	0.736018	0.981423	0.628108	A
Sclerotinia sclerotiorum hypovirus 1	0.633016	0.99989	0.687519	0.679234	A
Senecavirus A	0.651212	0.66802	0.738975	0.991849	B
Laodelphax striatella honeydew virus 1	0.651408	0.626649	0.909708	0.859075	A
Cyprinid herpesvirus 2	0.656618	0.631676	0.907319	0.865976	A
Limnipivirus C	0.661443	0.763817	0.667984	0.984999	C
Pandoravirus salinus	0.66398	0.823195	0.647519	0.948763	A
Ictalurid herpesvirus 1	0.67046	0.65722	0.81676	0.9576	B
Potamipivirus A	0.696966	0.999968	0.738497	0.742868	A
Jingmen tick virus	0.710193	0.918739	0.687416	0.896199	C
Maruca vitrata nucleopolyhedrovirus	0.71215	0.99948	0.76305	0.7457	C
Cardiovirus B	0.782739	0.985961	0.86439	0.781275	B
Broad bean mottle virus	0.841889	0.835415	0.983684	0.914708	A
Pleurotus ostreatus virus 1	0.842306	0.883721	0.853267	0.997707	A
Synechococcus phage S-RSM4	0.848389	0.948919	0.834832	0.961088	A
Hop trefoil cryptic virus 2	0.854378	0.958134	0.955904	0.841065	A
Synechococcus phage S-RIM2	0.879243	0.990909	0.930176	0.876543	A
Helicoverpa armigera nucleopolyhedrovirus	0.903198	0.951039	0.898139	0.989027	C
Glypta fumiferanae ichnovirus	0.90563	0.956014	0.899405	0.986888	A
Hibiscus latent Fort Pierce virus	0.906143	0.95273	0.989283	0.901168	A
Human endogenous retrovirus K	0.9129	0.99994	0.92533	0.92934	C
Cowpea chlorotic mottle virus	0.932861	0.965145	0.993259	0.929756	B
Red clover cryptic virus 2	0.935419	0.931916	0.967781	0.992754	A
Molluscum contagiosum virus	0.965608	0.984851	0.963055	0.995005	A
Cotesia congregata bracovirus	0.967856	0.990436	0.991574	0.964646	A
